# Supplementary material
Source: PubMed Central journal article supplement (PMC3010573)
Supplement: bph0161-1645-SD1.pdf [file bph0161-1645-SD1.pdf]

**Table S1: Full chemical names of the tested analogues.**

|                          |                                                                                                                           |
|--------------------------|---------------------------------------------------------------------------------------------------------------------------|
| cGMP                     | Guanosine- 3', 5'- cyclic monophosphate                                                                                   |
| cAMP                     | Adenosine- 3', 5'- cyclic monophosphate                                                                                   |
| 2-NH <sub>2</sub> -cPuMP | 2- Aminopurine riboside- 3', 5'- monophosphate                                                                            |
| 8-AET-cGMP               | 8- (2- Aminoethylthio) guanosine- 3', 5'- cyclic monophosphate                                                            |
| 8-APT-cGMP               | 8- (2- Aminophenylthio) guanosine- 3', 5'- cyclic monophosphate                                                           |
| 1-NH <sub>2</sub> -cGMP  | N <sup>1</sup> - Aminoguanosine- 3', 5'- cyclic monophosphate                                                             |
| 2'-AHC-cGMP              | 2'- O- (6- Aminohexylcarbamoyl) guanosine- 3', 5'- cyclic monophosphate                                                   |
| Sp-2'AHC-cGMPS           | 2'- O- (6- Aminohexylcarbamoyl) guanosine- 3', 5'- cyclic monophosphorothioate, Sp- isomer                                |
| 8-Br-cGMP                | 8- Bromoguanosine- 3', 5'- cyclic monophosphate                                                                           |
| Rp-8-Br-cGMPS            | 8- Bromoguanosine- 3', 5'- cyclic monophosphorothioate, Rp- isomer                                                        |
| Sp-8-Br-cGMPS            | 8- Bromoguanosine- 3', 5'- cyclic monophosphorothioate, Sp- isomer                                                        |
| 8-pCPT-cGMP              | 8- (4- Chlorophenylthio) guanosine- 3', 5'- cyclic monophosphate                                                          |
| Rp-8-pCPT-cGMPS          | 8- (4- Chlorophenylthio) guanosine- 3', 5'- cyclic monophosphorothioate, Rp- isomer                                       |
| Sp-8-pCPT-cGMPS          | 8- (4- Chlorophenylthio) guanosine- 3', 5'- cyclic monophosphorothioate, Sp- isomer                                       |
| Rp-8-pCPT-PET-cGMPS      | 8- (4- Chlorophenylthio)- β- phenyl- 1, N <sup>2</sup> - ethenoguanosine- 3', 5'- cyclic monophosphorothioate, Rp- isomer |
| Sp-8-pCPT-PET-cGMPS      | 8- (4- Chlorophenylthio)- β- phenyl- 1, N <sup>2</sup> - ethenoguanosine- 3', 5'- cyclic monophosphorothioate, Sp- isomer |
| 5,6-DM-cBIMP             | 5, 6- Dimethylbenzimidazole riboside- 3', 5'- cyclic monophosphate                                                        |
| DB-cGMP                  | N <sup>2</sup> , 2'- O- Dibutyrylguanosine- 3', 5'- cyclic monophosphate                                                  |
| 5,6-DCI-cBIMP            | 5, 6- Dichlorobenzimidazole riboside- 3', 5'- cyclic monophosphate                                                        |
| Sp-5,6-DCI-cBIMPS        | 5, 6- Dichlorobenzimidazole riboside- 3', 5'- cyclic monophosphorothioate, Sp- isomer                                     |
| 2'-dcGMP                 | 2'- Deoxyguanosine- 3', 5'- cyclic monophosphate                                                                          |
| Rp-cGMPS                 | Guanosine- 3', 5'- cyclic monophosphorothioate, Rp-isomer                                                                 |
| Sp-cGMPS                 | Guanosine- 3', 5'- cyclic monophosphorothioate, Sp- isomer                                                                |
| ciMP                     | Inosine- 3', 5'- cyclic monophosphate                                                                                     |
| MANT-cGMP                | 2'- O- (N- Methylantraniloyl) guanosine- 3', 5'- cyclic monophosphate                                                     |
| 2'O-MS-cGMP              | 2'- O- Monosuccinylguanosine- 3', 5'- cyclic monophosphate                                                                |
| 2'O-MS-TME-cGMP          | 2'- O- Monosuccinylguanosine- 3', 5'- cyclic monophosphate, tyrosylmethyl ester                                           |
| 2'O-ME-cGMP              | 2'- O- Methylguanosine- 3', 5'- cyclic monophosphate                                                                      |
| PET-cGMP                 | β- Phenyl- 1, N <sup>2</sup> - ethenoguanosine- 3', 5'- cyclic monophosphate                                              |
| 8-Br-PET-cGMP            | 8 - Bromo- β- phenyl- 1, N <sup>2</sup> - ethenoguanosine- 3', 5'-cyclic monophosphate                                    |
| Rp-8-Br-PET-cGMPS        | 8- Bromo- β- phenyl- 1, N <sup>2</sup> - ethenoguanosine- 3', 5'- cyclic monophosphorothioate, Rp- isomer                 |
| Sp-8-Br-PET-cGMPS        | 8- Bromo- β- phenyl- 1, N <sup>2</sup> - ethenoguanosine- 3', 5'- cyclic monophosphorothioate, Sp- isomer                 |
| cPuMP                    | Purine riboside- 3', 5'- cyclic monophosphate                                                                             |
| cXMP                     | Xanthosine- 3', 5'- cyclic monophosphate                                                                                  |

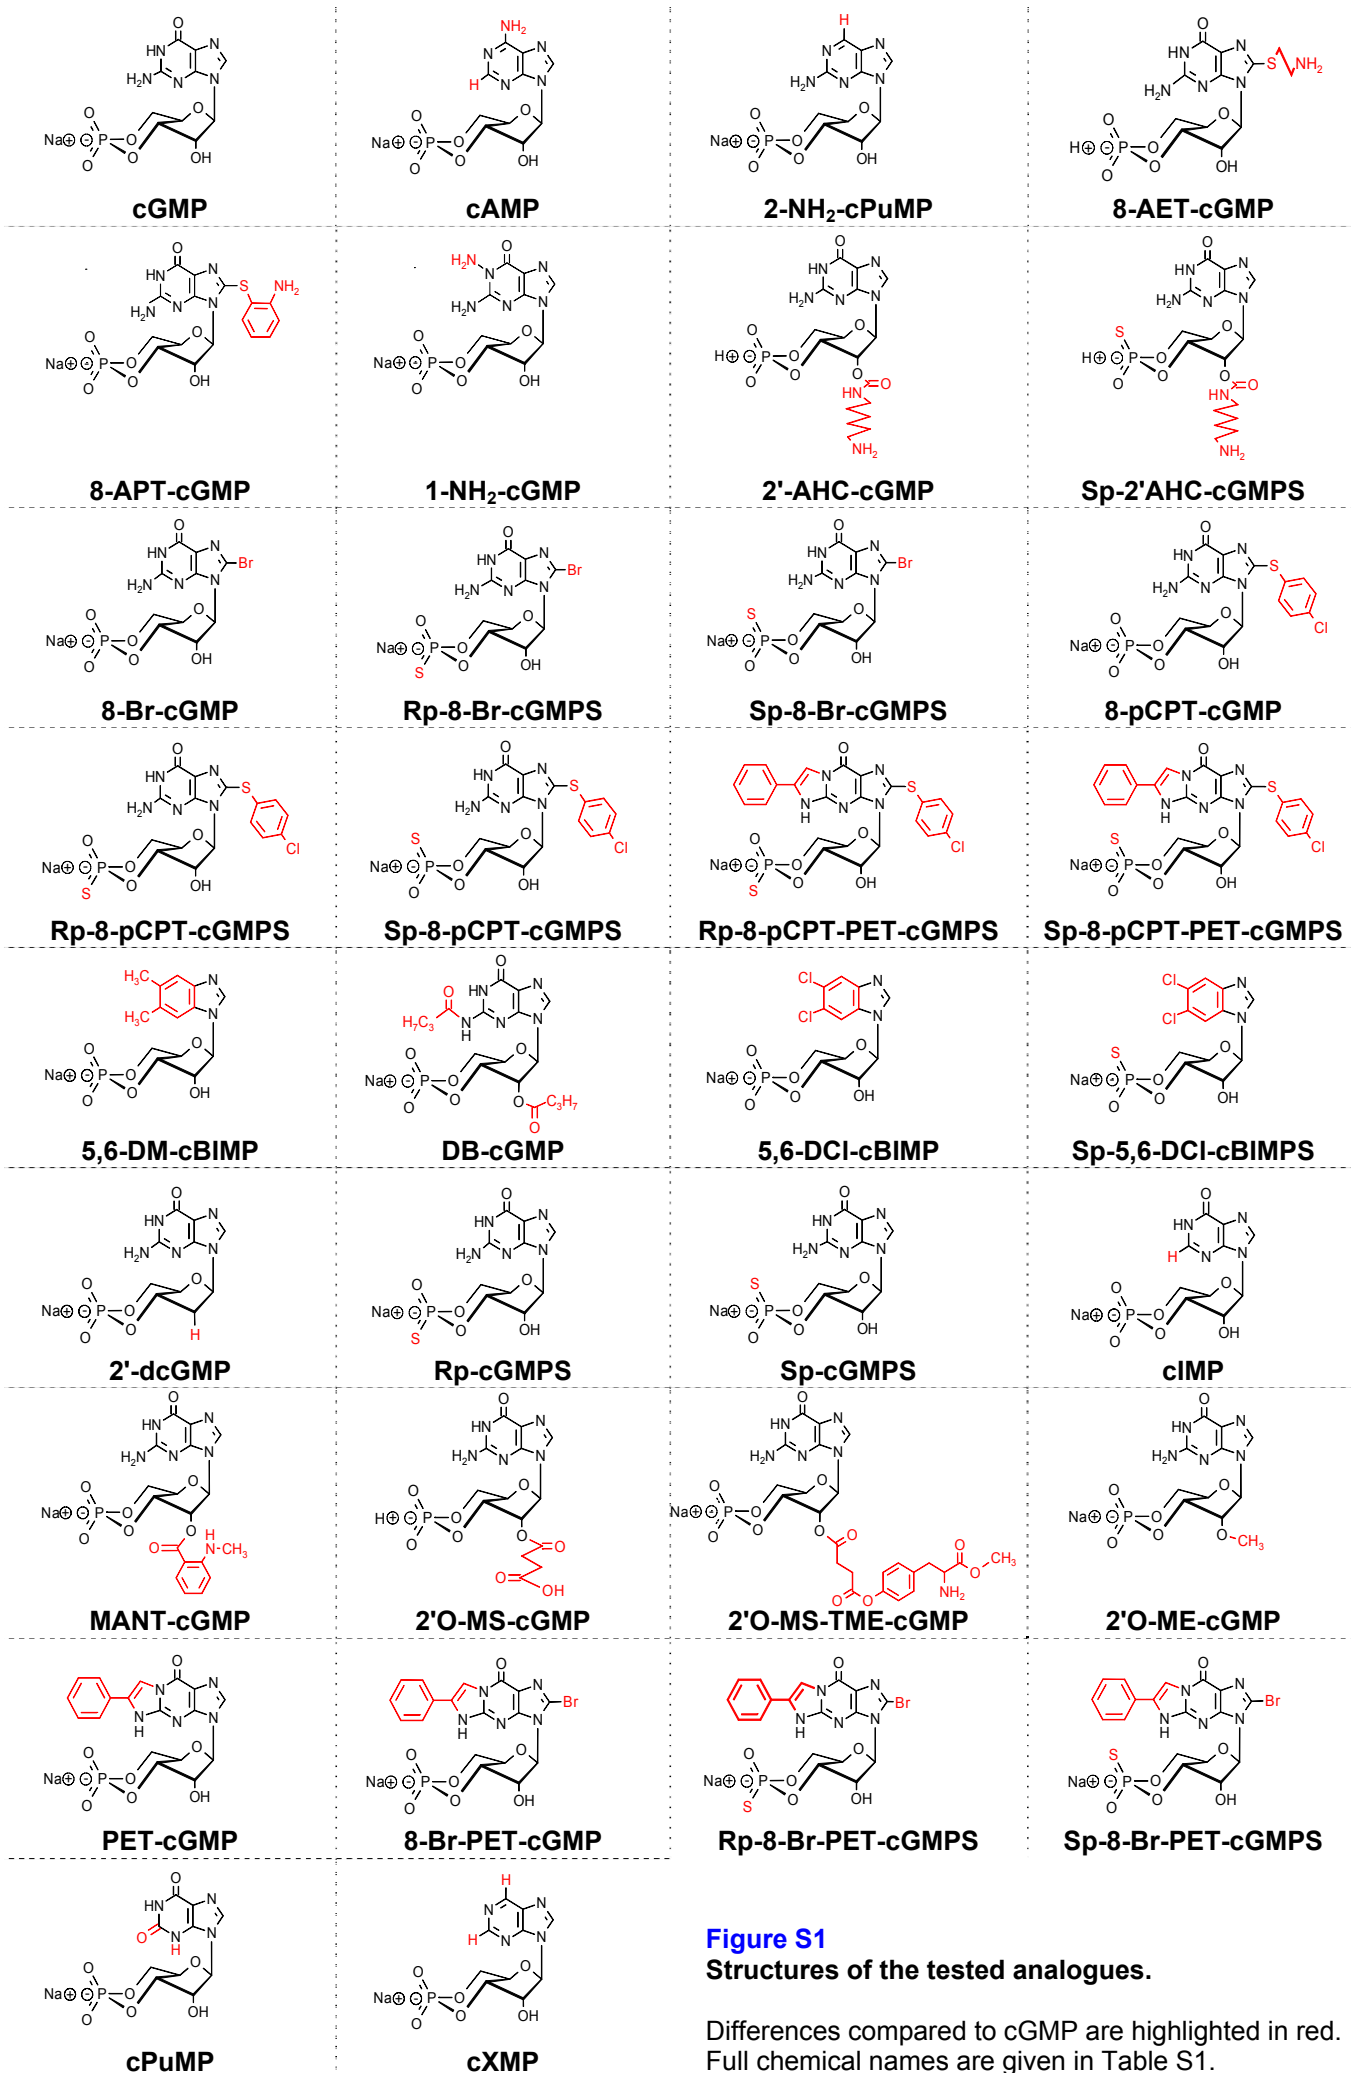

**Figure S1**

**Structures of the tested analogues.**

Differences compared to cGMP are highlighted in red. Full chemical names are given in Table S1.

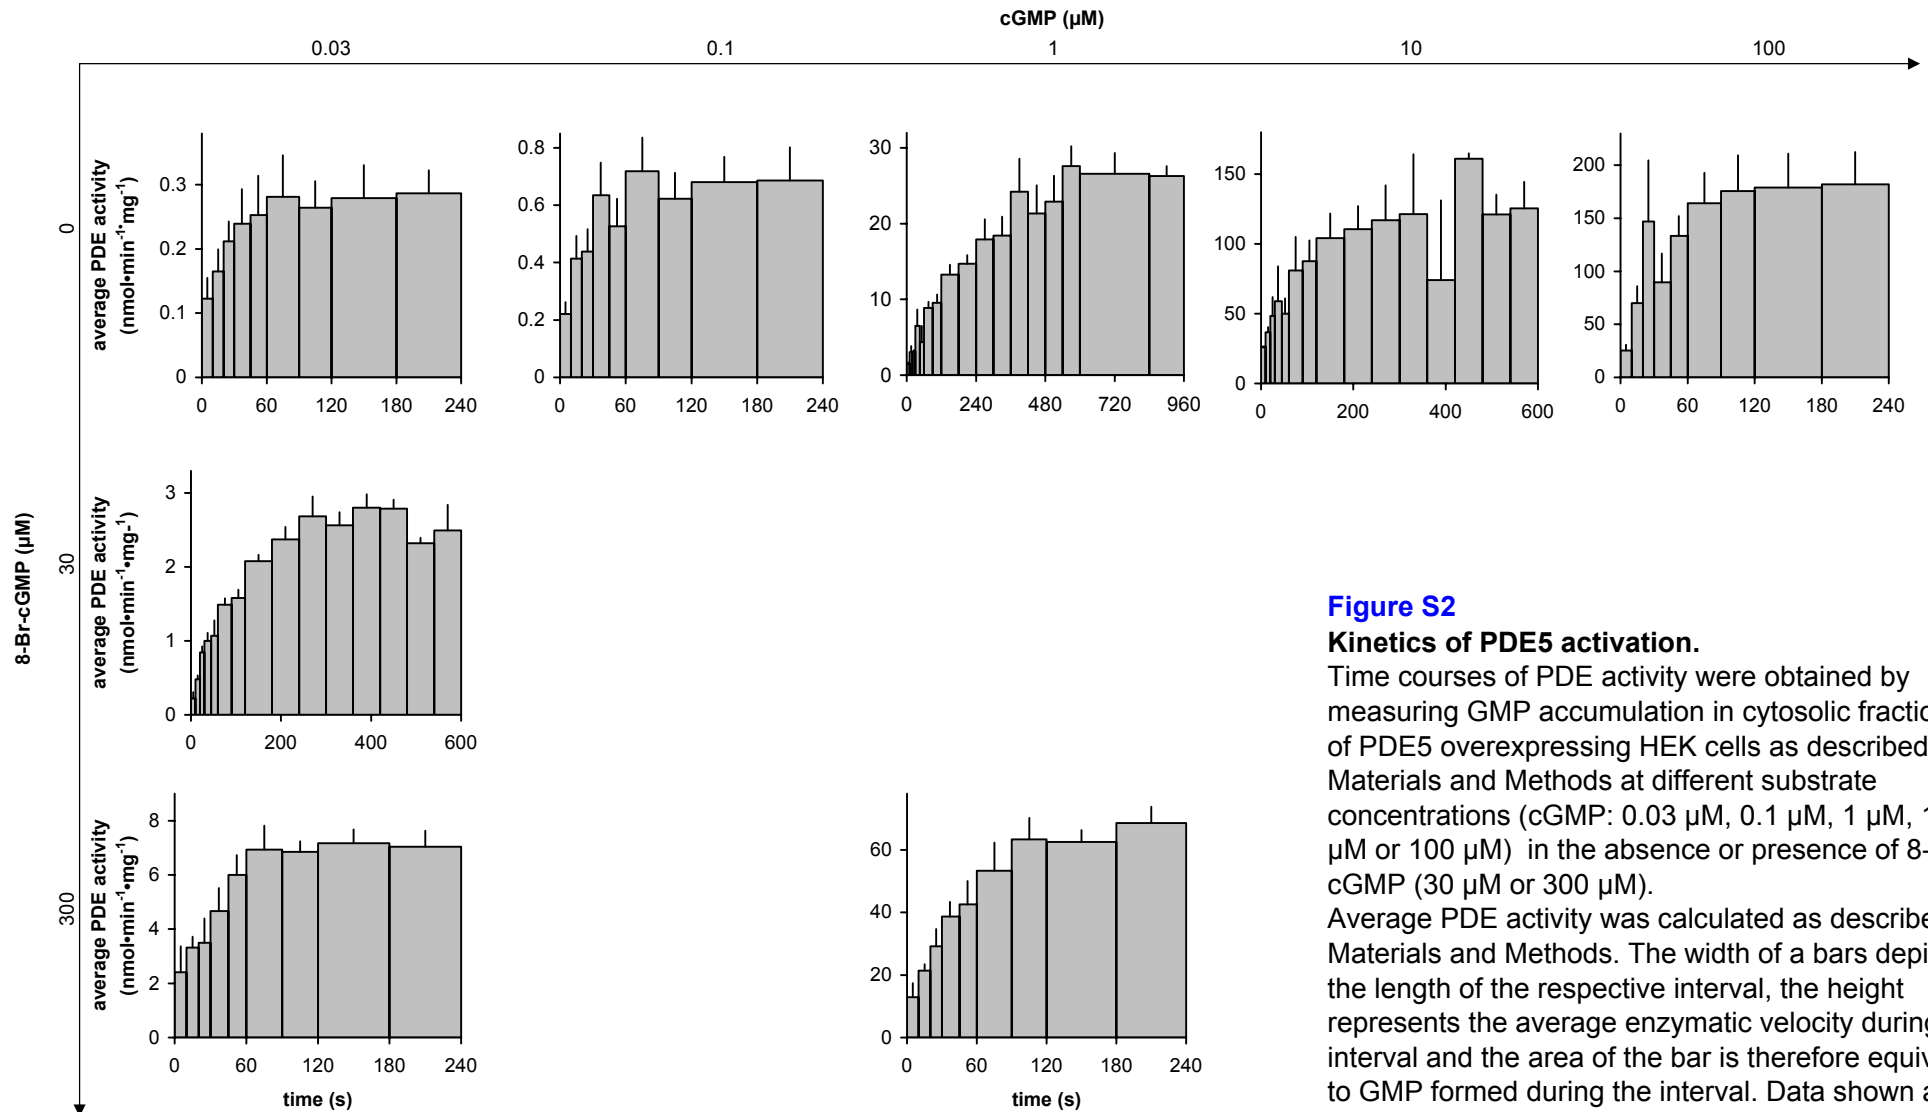

**Figure S2**

**Kinetics of PDE5 activation.**

Time courses of PDE activity were obtained by measuring GMP accumulation in cytosolic fractions of PDE5 overexpressing HEK cells as described in Materials and Methods at different substrate concentrations (cGMP: 0.03 μM, 0.1 μM, 1 μM, 10 μM or 100 μM) in the absence or presence of 8-Br-cGMP (30 μM or 300 μM). Average PDE activity was calculated as described in Materials and Methods. The width of a bars depicts the length of the respective interval, the height represents the average enzymatic velocity during the interval and the area of the bar is therefore equivalent to GMP formed during the interval. Data shown are mean ± SD of at least three independent experiments performed in duplicates.

Time courses at 0.03, 1 and 100 μM are replicated from Figure 4 to allow for side-by-side comparison of the traces.

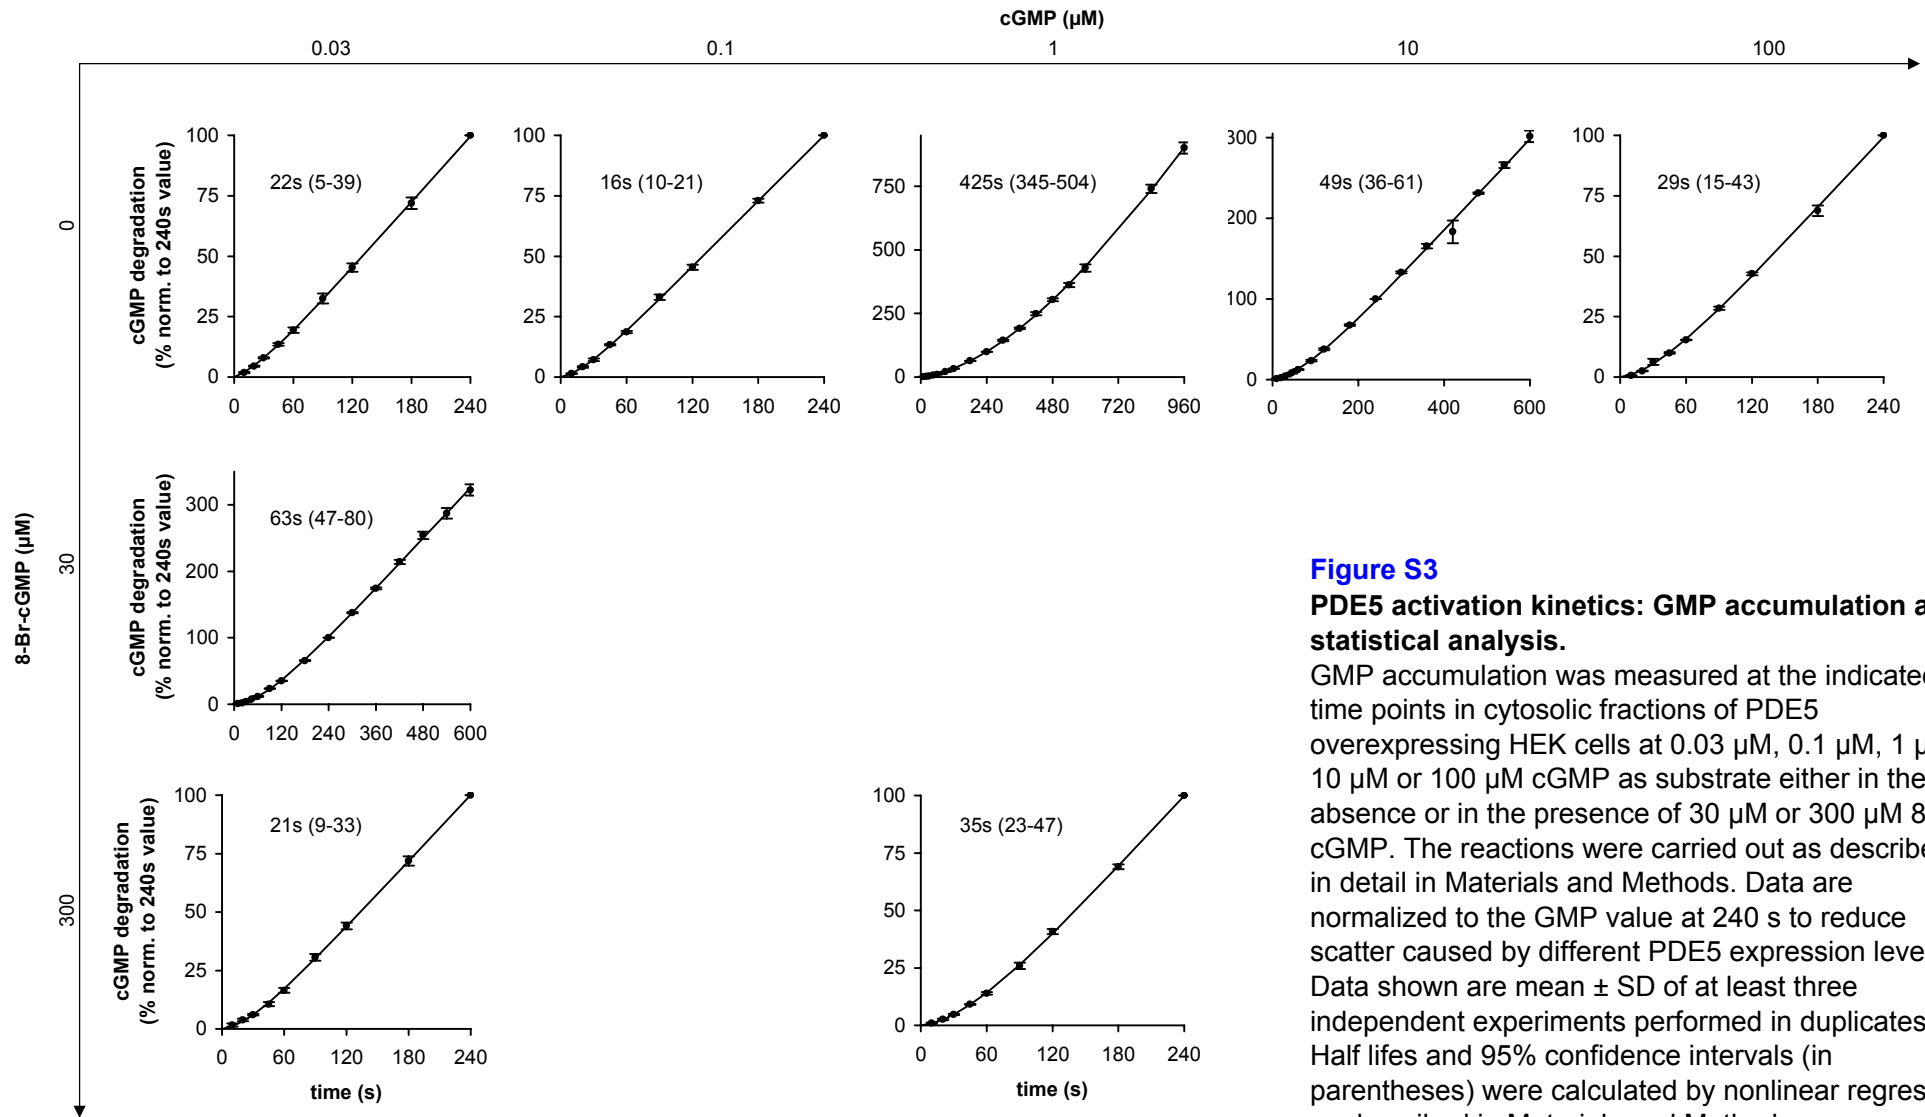

**Figure S3**

**PDE5 activation kinetics: GMP accumulation and statistical analysis.**

GMP accumulation was measured at the indicated time points in cytosolic fractions of PDE5 overexpressing HEK cells at 0.03  $\mu\text{M}$ , 0.1  $\mu\text{M}$ , 1  $\mu\text{M}$ , 10  $\mu\text{M}$  or 100  $\mu\text{M}$  cGMP as substrate either in the absence or in the presence of 30  $\mu\text{M}$  or 300  $\mu\text{M}$  8-Br-cGMP. The reactions were carried out as described in detail in Materials and Methods. Data are normalized to the GMP value at 240 s to reduce scatter caused by different PDE5 expression levels. Data shown are mean  $\pm$  SD of at least three independent experiments performed in duplicates. Half lives and 95% confidence intervals (in parentheses) were calculated by nonlinear regression as described in Materials and Methods. Time courses at 0.03, 1 and 100  $\mu\text{M}$  are replicated from Figure 5 to allow for side-by-side comparison of the traces.

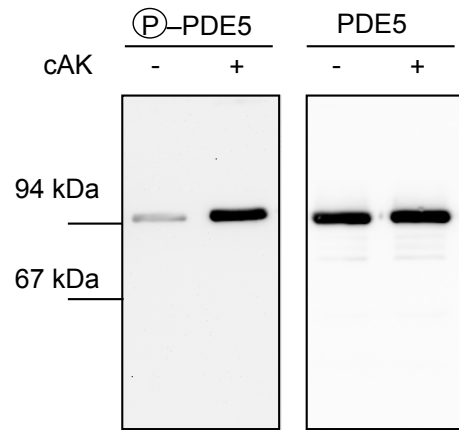

**Figure S4**  
Complete lanes of the Western blot shown in Figure 7B.
